# Supplementary material
Source: PubMed Central journal article supplement (PMC11018285)
Supplement: NIHMS1980615-supplement-Sup_figures_and_tables.pdf [file NIHMS1980615-supplement-Sup_figures_and_tables.pdf]

Supplementary Materials for

***Plasmodium falciparum* Pf77 and male development gene 1 as vaccine antigens that induce potent transmission-reducing antibodies**

Abhai K. Tripathi *et al.*

Corresponding author: Sanjai Kumar, [sanjai.kumar@fda.hhs.gov](mailto:sanjai.kumar@fda.hhs.gov)

*Sci. Transl. Med.* **13**, eabg2112 (2021)  
DOI: 10.1126/scitranslmed.abg2112

**The PDF file includes:**

Figs. S1 to S7  
Tables S1 to S6

**Other Supplementary Material for this manuscript includes the following:**

Data file S1

**Supplementary Materials:**

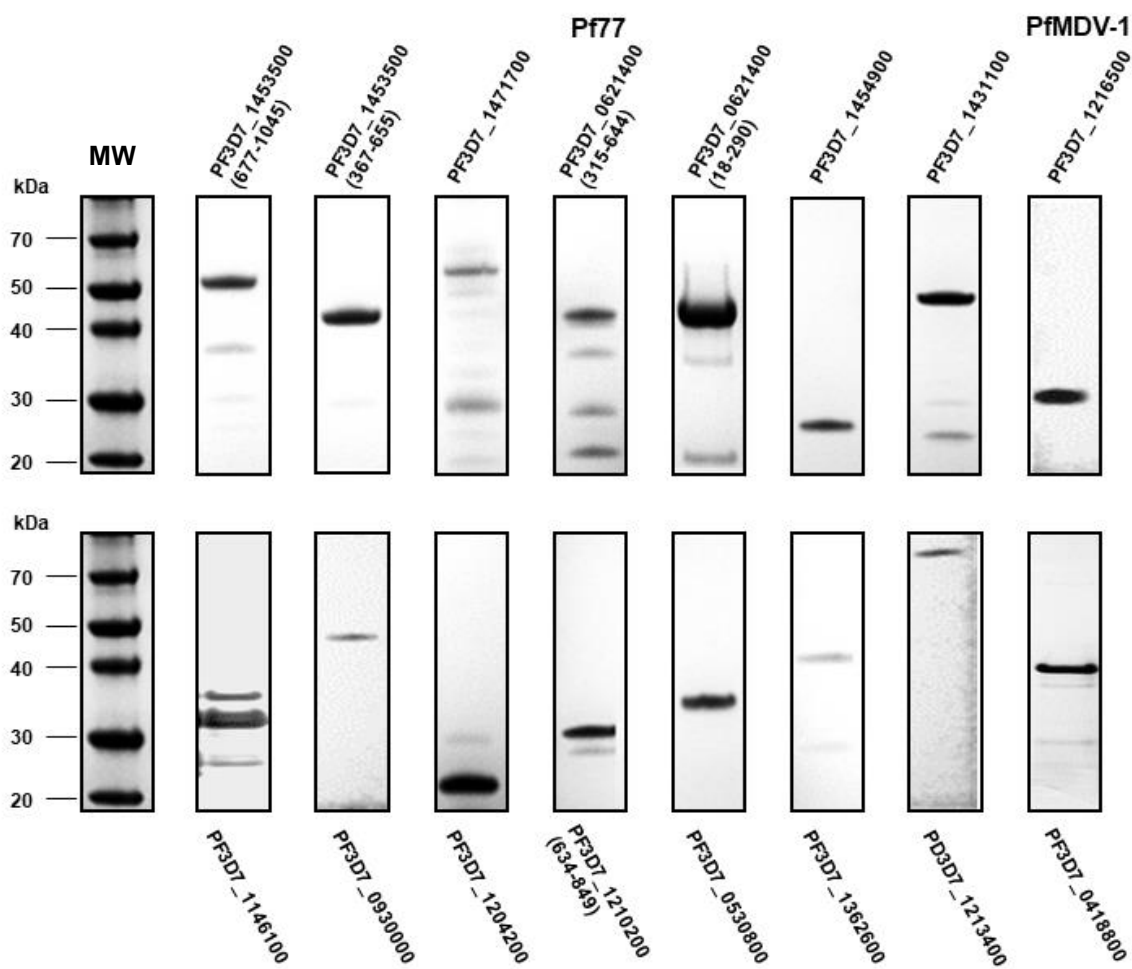

**Fig. S1. SDS-PAGE analysis of the recombinant purified 16 *P. falciparum* gametocyte antigen domains expressed in *E. coli*. MW: Molecular weight marker.**

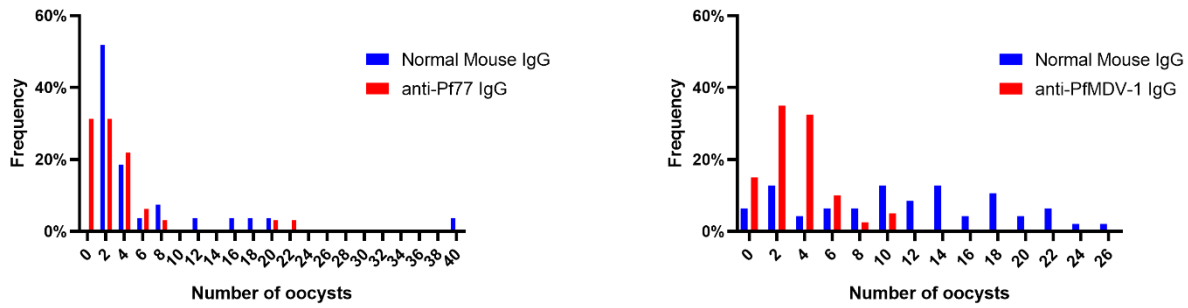

**Fig. S2. Effect of anti-Pf77 and anti-PfMDV-1 IgG on oocyst development.** *P. falciparum* oocyst development was measured as a reduction in average oocyst burden and proportion of mosquitoes infected in mosquito midgut in the standard membrane feeding assay performed at Johns Hopkins University. Transmission reducing activity of each antigen was assessed in terms of reduction in the total oocyst burden and absence of oocyst in mosquito midguts. Mosquitoes fed on antibodies raised against (A) Pf77 ( $n=32$ ; negative control  $n=27$ ) or (B) PfMDV-1 ( $n=40$ ; negative control  $n=47$ ). Individual oocyst counts acquired from each mosquito were plotted as a histogram.

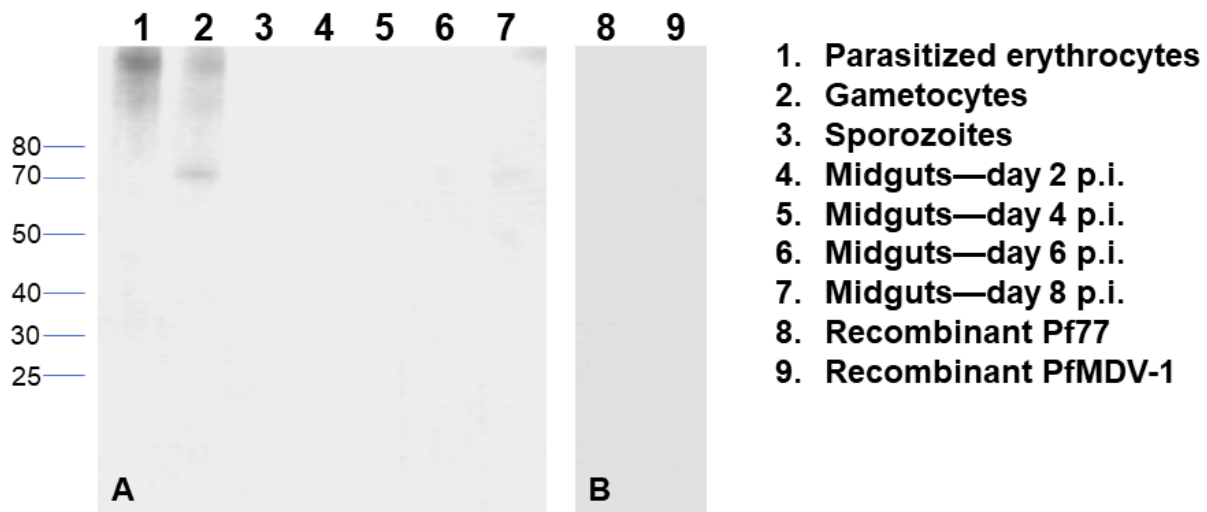

**Fig. S3. Western blots demonstrating absence of reactivity of pooled serum samples from non-immunized mice against *P. falciparum* lysates.** (A) *P. falciparum* parasite lysates were extracted from (1)  $2 \times 10^6$  parasitized asexual stage erythrocytes, (2)  $1.5 \times 10^6$  gametocytes, (3)  $1.8 \times 10^6$  sporozoites, and (4 to 7) mosquito midguts with approximately 10 oocysts at 2, 4, 6, and 8 days following infection, respectively. Normal mouse serum (1:1000 dilution) exhibited only background reactivity to protein lysates from parasitized erythrocytes and gametocytes and no reactivity to any of the other stages. (B) A second gel was loaded with 100 ng of recombinantly expressed (8) Pf77 and (9) PMDV-1. Normal mouse serum exhibited no reactivity to either recombinant protein.

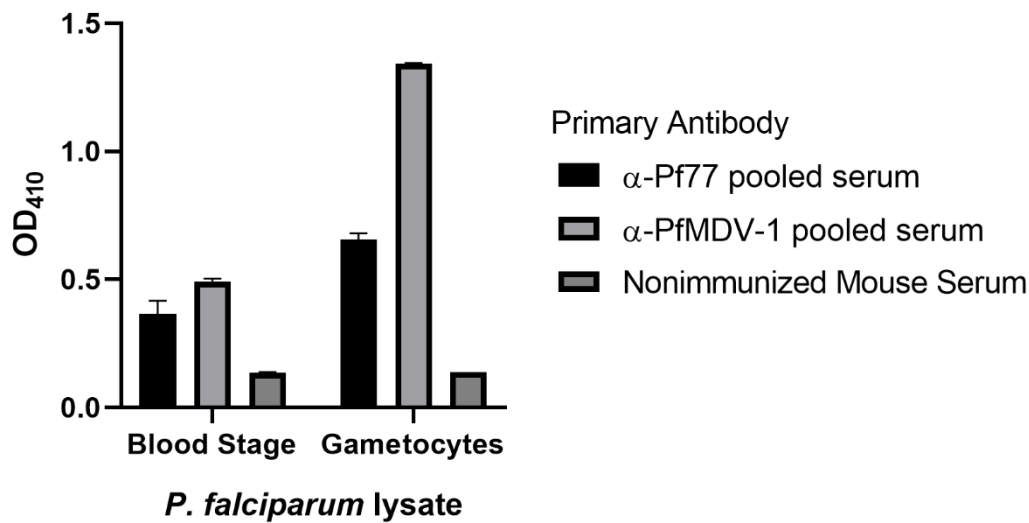

**Fig. S4. ELISA IgG reactivity of pooled mouse sera from mice immunized with recombinant Pf77 or PfMDV-1.** ELISA plates were coated with 200 ng/well of protein lysate from *P. falciparum* schizonts or gametocytes. Wells were incubated with 1:50 dilutions of pooled mouse sera either from mice immunized with recombinant Pf77 or recombinant PfMDV-1. Pooled sera from nonimmunized mice served as control. Based on the higher ELISA reactivity in prior assays for reactivity of antibody targeting PfMDV-1 towards gametocytes, wells were coated with 100 ng of parasite lysate and incubated with 1:1000 dilutions of pooled immunized mouse serum. Following incubation with goat anti-mouse IgG HRP-conjugated antibody, antigen-antibody reactivity was detected by development with ABTS [2,2'-azino-di-(3-ethylbenzthiazoline sulfonic acid)] substrate for 15 minutes. ELISA IgG reactivity against protein lysates from *P. falciparum* schizonts (Pf77:  $P = 0.0242$ ; PfMDV-1:  $P = 0.00053$ ) and gametocytes (Pf77:  $P = 0.00107$ ; PfMDV-1:  $P = 0.000006$ ) was observed in pooled serum samples from recombinant Pf77- or PfMDV-1-immunized mice.

## A. Pf77

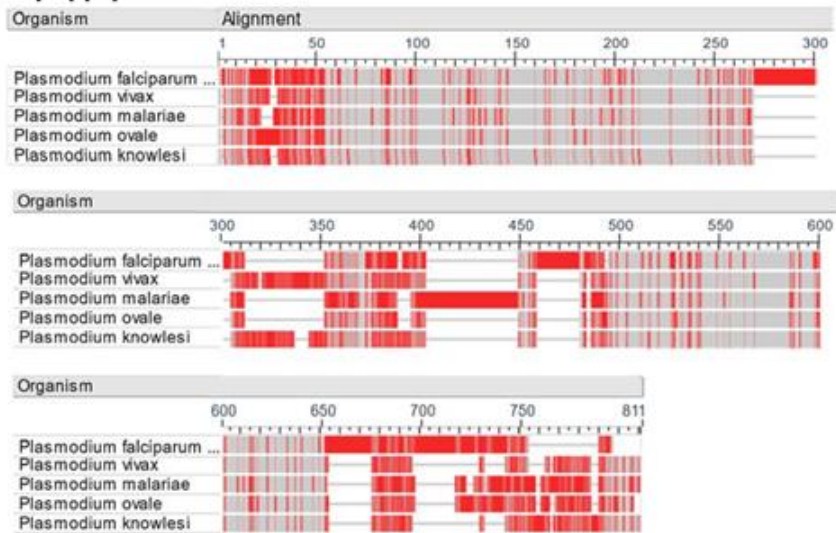

## B.

| Species              | Accession No.  | Length (aa) | Identity (%) | Coverage (%) |
|----------------------|----------------|-------------|--------------|--------------|
| <i>P. falciparum</i> | XP_966198.1    | 664         | 100.00       | 100.00       |
| <i>P. vivax</i>      | KMZ79839.1     | 597         | 51.92        | 79.97        |
| <i>P. malariae</i>   | XP_028062008.1 | 619         | 49.93        | 81.33        |
| <i>P. ovale</i>      | SBS85303.1     | 583         | 57.64        | 83.28        |
| <i>P. knowlesi</i>   | OTN64542.1     | 604         | 51.29        | 79.97        |

## C. PfMDV-1

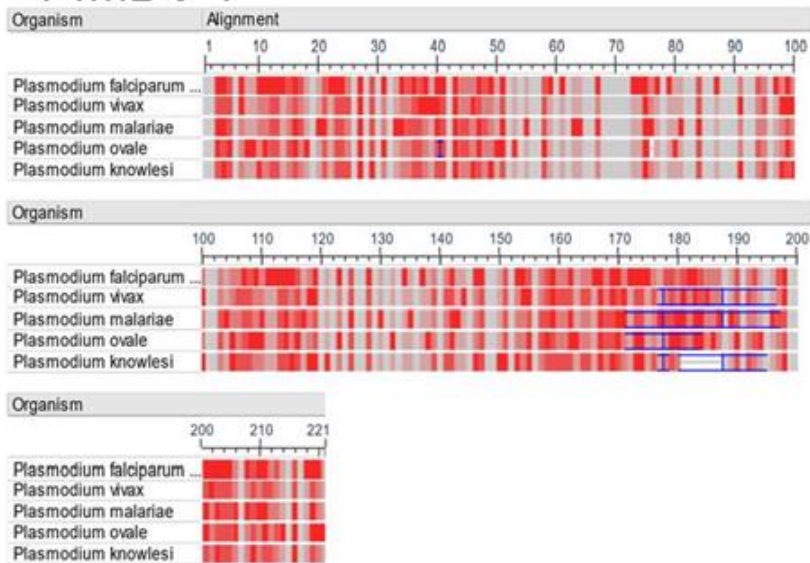

## D.

| Species              | Accession No.  | Length (aa) | Identity (%) | Coverage (%) |
|----------------------|----------------|-------------|--------------|--------------|
| <i>P. falciparum</i> | XP_001350568.1 | 221         | 100.00       | 100.00       |
| <i>P. vivax</i>      | SC075418.1     | 268         | 35.42        | 100.00       |
| <i>P. malariae</i>   | SCP03455.1     | 329         | 32.83        | 100.00       |
| <i>P. ovale</i>      | SCQ16983.1     | 241         | 43.39        | 99.55        |
| <i>P. knowlesi</i>   | OTN64272.1     | 248         | 39.22        | 96.83        |

**Fig. S5. Sequence alignment of orthologs of *P. falciparum* 3D7 proteins Pf77 and PfMDV-1.**

Orthologous sequences to (A) Pf77 and (C) PfMDV-1 were searched for *P. vivax*, *P. malariae*, *P. ovale* and *P. knowlesi* by using the NCBI BLASTp tool. Sequences of these human *Plasmodium* species isolates were aligned using the NCBI COBALT tool and anchored to the sequence derived from the *P. falciparum* 3D7 reference genome. Sequence identity and coverage of the homologs from each *Plasmodium* species compared to the *P. falciparum* 3D7 reference genome are shown in (B) and (D) for Pf77 and PfMDV-1, respectively.

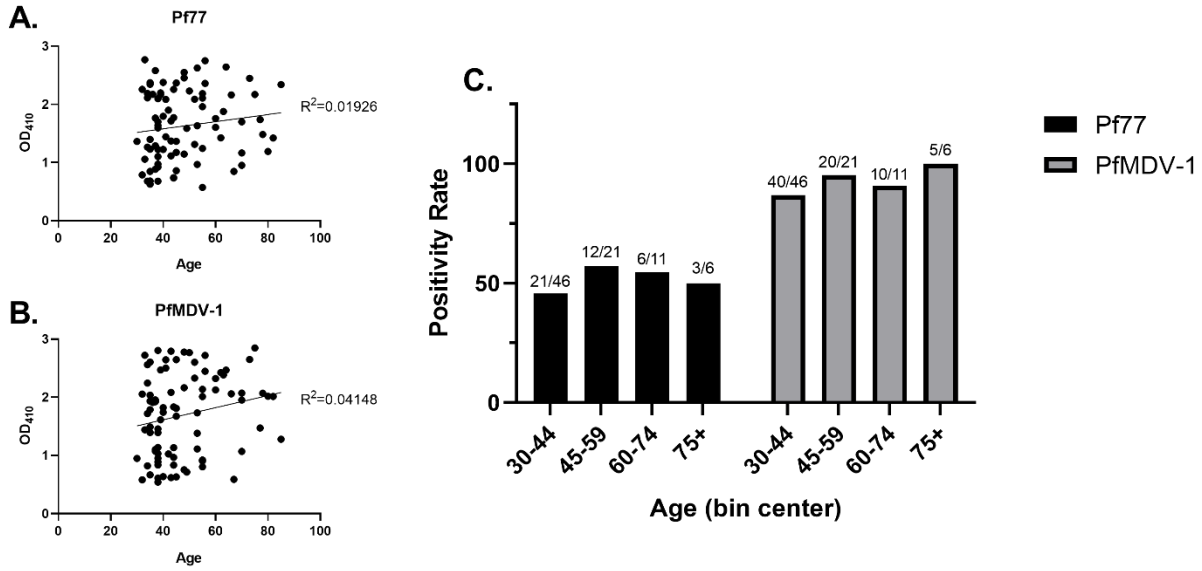

**Fig. S6. Seroreactivity to Pf77 and PfMDV-1 among Ghanaian adults compared to age.** (A and B) IgG reactivity (OD<sub>410</sub>) towards recombinant Pf77 (A) and recombinant PfMDV-1 (B) was plotted against age in Ghanaian serum samples. The coefficient of determination ( $R^2$ ) is shown. (C) ELISA positivity rate was plotted based on age of the individual.

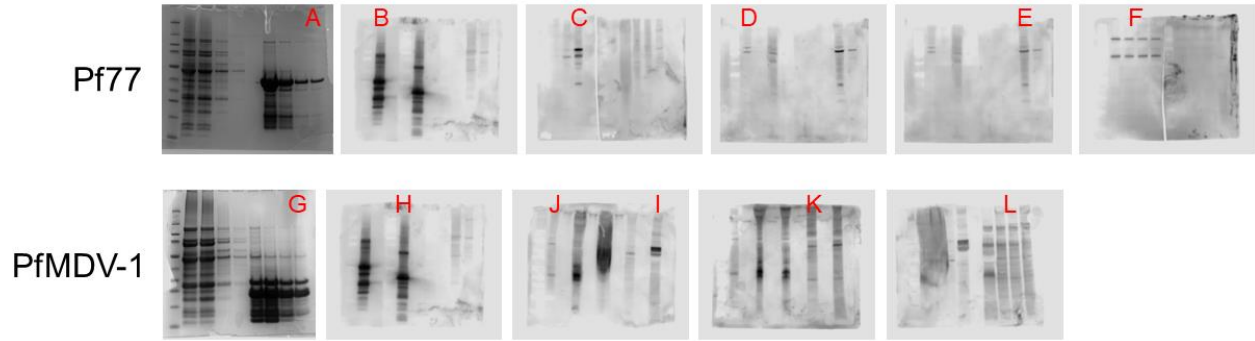

**Fig. S7. Raw SDS-PAGE and Western blot images of recombinant Pf77 and PfMDV-1.** Raw data showing the original gels and blots from which lanes were used to construct figure 3 in the main article. *P. falciparum* proteins Pf77 and PfMDV-1 were expressed recombinantly. The purity and identity of each recombinant protein was confirmed by SDS-PAGE analysis (**A**, **G**). IgG was purified from pooled antisera from five mice following immunization with recombinant protein and reactivity of the antisera to the recombinant protein was confirmed by Western blot (**B**, **H**). The IgG was used to detect the presence of either antigen in protein lysates from each stage of the *P. falciparum* life cycle by Western blot. The equivalent of  $4.5 \times 10^5$  sporozoites (**C**, **I**),  $1.875 \times 10^6$  parasitized erythrocytes (**D**, **J**),  $1.2 \times 10^6$  gametocytes (**E**, **K**), and 10 oocysts (**F**, **L**) were loaded into each well. Following optimization of protein, primary antibody, and secondary antibody concentrations, representative lanes from SDS-PAGE gels and Western blots are presented in Fig. 3B. The lanes included in Fig. 3B are indicated in the panels (A to L).

**Table S1. *Plasmodium falciparum* genes selected for recombinant expression in *E. coli*, immunization of BALB/c mice, and evaluation by standard membrane feeding assay.** Based on the results of microarray analysis, 56 genes were identified as being transcriptionally overexpressed in gametocytes as compared to asynchronous blood stage parasites. Of these genes, 16 constructs from 13 genes from the dataset plus one additional gene (Pf3D7\_120-4200) were recombinantly expressed in *E. coli*. Female BALB/c mice (6-8 weeks old) were immunized by four subcutaneous injections at four-week intervals with an emulsion of 20 µg recombinant protein along with either a combination of Montanide and CpG (100 µL and 25 µg in 100 µL PBS, respectively) or a series including Complete Freund's Adjuvant (primary immunization) and Incomplete Freund's Adjuvant (three boosts). Five mice were immunized per group; ultimately, 39 immunizations were performed, with serum collected from 195 experimental mice. Serum was collected two weeks following the four immunizations and IgG was purified. Initial screening for transmission reducing activity (TRA) by the standard membrane feeding assay (SMFA) was performed at the Johns Hopkins Malaria Research Institute (JHMRI). Subsequent screenings of antigens displaying highest TRA in the assays performed at JHMRI were sent to the National Institutes of Health (NIH) laboratory for further evaluation.

| Gene                            | PlasmoDB ID   | Antigenic Domain | Primers                                                             |
|---------------------------------|---------------|------------------|---------------------------------------------------------------------|
| conserved                       |               |                  |                                                                     |
| protein,<br>unknown<br>function | Pf3D7_1362600 | 1–267            | 5'–AGAAAGTTTAGATGAGAGATGGA–3'<br>5'–TAATTTGATCCTCTTAAATATTTCTTCT–3' |
| conserved                       |               |                  |                                                                     |
| protein,<br>unknown<br>function | Pf3D7_1146100 | 1–175            | 5'–AAAGTGTTTAATTTTTTGTCTCTCC–3'<br>5'–TGATTCAGTCTTTATAAGGACG–3'     |
| NAD(P)<br>transhydrogenase      | Pf3D7_1453500 | 367–655          | 5'–AGATTATGAAAATATGGGAGAATC–3'<br>5'–GACAATAGATAAATTAACATCACG–3'    |
| NAD(P)                          | Pf3D7_1453500 | 677–1045         | 5'–AGATATAGGTACCAATATATTAATGC–3'                                    |

|                   |               |           |                                       |
|-------------------|---------------|-----------|---------------------------------------|
| transhydrogenase  |               |           | 5'–TTCCGATATTGGTTCAATAAGTTG–3'        |
| conserved         |               |           |                                       |
| Plasmodium        |               |           |                                       |
| protein,          | PF3D7_1471700 | 15–527    | 5'–AGATATAAAAGGGAACGATATTTATGATAAC–3' |
| unknown           |               |           | 5'–CTTTTTATTCTTAATATCAGTCCT–3'        |
| function          |               |           |                                       |
| Pf77 protein      | PF3D7_0621400 | 18 - 290  | 5'–AAAAGAAAAAGAGGACGATGGT–3'          |
|                   |               |           | 5'–ATGCATATTACTATCATTATATAC–3'        |
| Pf77 protein      | PF3D7_0621400 | 315 - 664 | 5'–AGACGAATCTGTAAAGAAATCCCT–3'        |
|                   |               |           | 5'–ATTAATATCTTCATTTTGCTTGC–3'         |
| conserved         |               |           |                                       |
| Plasmodium        |               |           |                                       |
| protein,          | PF3D7_1204200 | 155 - 292 | 5'–AAACATGACGAATGTTCAAGGGA–3'         |
| unknown           |               |           | 5'–TTCCATATCGGAATATTTTTCAC–3'         |
| function          |               |           |                                       |
| procollagen       |               |           |                                       |
| lysine 5-         |               |           | 5'–ATCCAAAGATGAAAAAAAAATAATAG–3'      |
| dioxygenase,      | PF3D7_0930000 | 1 - 463   | 5'–AGATGTATACTTATTTTCAAACCCA–3'       |
| putative          |               |           |                                       |
| zinc finger       |               |           | 5'–AGATAATAAAAATGTTCATTAGAG–3'        |
| protein, putative | PF3D7_1210200 | 634 - 980 | 5'–TTTCCATTAGATGTTATAGAT–3'           |
| conserved         |               |           |                                       |
| protein,          | PF3D7_1454900 | 3 - 154   | 5'–ACATCCCTTTAATTTTGTGCCT–3'          |

|                   |               |          |                                     |
|-------------------|---------------|----------|-------------------------------------|
| unknown           |               |          | 5'–CATAATATTTTTATTTATATTGGTCA–3'    |
| function          |               |          |                                     |
| PhIL1             |               |          | 5'–AGATAAAGATAAGGATAAAAGCAAAAAC–3'  |
| interacting       | PF3D7_1431100 | 1 - 340  | 5'–TGTTTCCTTGAATCTATGAAATTC–3'      |
| protein PIP2      |               |          |                                     |
| MOLO1             |               |          |                                     |
| domain-           | PF3D7_0418800 | 21 – 230 | 5'–AGTCCCTATAGAAAATGCTCCT–3'        |
| containing        |               |          | 5'–TTGAGCAGTTTGTGTTGGTGGA–3'        |
| protein, putative |               |          |                                     |
| male              |               |          | 5'–AAACATAGGAAAACCTCAGGTTAAC–3'     |
| development       | PF3D7_1216500 | 30 - 221 | 5'–ATCACTATCACTGTGTGTTTTTATATC–3'   |
| gene 1            |               |          |                                     |
| kelch domain-     |               |          | 5'–ATCAGATATTTTCAGATTTCTCTG–3'      |
| containing        | PF3D7_1213400 | 1 - 576  | 5'–TTTATTTTCCATATTTATTTGTGGTTCCT–3' |
| protein           |               |          |                                     |
| CPW-WPC           | PF3D7_0530800 | 25 - 254 | 5'–AGATAAGAAAGAGGAACTTTTTTCTGAC–3'  |
| family protein    |               |          | 5'–GTGATAATTTTCTTCAACCTC–3'         |

---

**Table S2. Confirmation of the identity of potent transmission reducing antigens by mass spectrometry.** The amino acid sequence identities of recombinant Pf77 and PfMDV-1 used to immunize mice were confirmed by mass spectrometry. Recombinant proteins were run on an SDS-PAGE gel and the contents of the largest band were digested overnight with trypsin. The resulting proteolytic peptides were analyzed by liquid chromatography-mass spectrometry using a Thermo Fisher Ultimate LC and Fusion Orbitrap MS.

| Accession | Description                                                                             | Coverage    | # Peptides       | # PSMs                              | # Unique Peptides | # Protein Groups | # AAs      | MW [kDa] | calc. pI                  | Protein FDR Confidence | Exp. q-value   | Score            | # Peptides            |
|-----------|-----------------------------------------------------------------------------------------|-------------|------------------|-------------------------------------|-------------------|------------------|------------|----------|---------------------------|------------------------|----------------|------------------|-----------------------|
| C6KT52    | Pf77 protein OS=Plasmodium falciparum (isolate 3D7) OX=36329 GN=PF3D7_0621400 PE=4 SV=1 | 16.56626506 | 14               | 355                                 | 14                | 1                | 664        | 77.406   | 5.22                      | High                   | 0              | 1078.809012      | 14                    |
|           |                                                                                         | Confidence  | Sequence         | Modifications                       | Contaminant       | # Protein Groups | # Proteins | # PSMs   | Master Protein Accessions | # Missed Cleavages     | Theo. MH+ [Da] | XCorr Sequest HT | Confidence Sequest HT |
|           |                                                                                         | High        | NNNIFGYDINMNGNHR | 2xDeamidated [N]; 1xOxidation [M11] | FALSE             | 1                | 1          | 17       | C6KT52                    | 0                      | 1910.8086      | 5.933856487      | High                  |
|           |                                                                                         | High        | NNNIFGYDINMNGNHR | 1xDeamidated [N]; 1xOxidation [M11] | FALSE             | 1                | 1          | 141      | C6KT52                    | 0                      | 1909.824584    | 5.705883503      | High                  |
|           |                                                                                         | High        | EKEDDGLNTGYINK   |                                     | FALSE             | 1                | 1          | 35       | C6KT52                    | 1                      | 1595.754756    | 5.405125618      | High                  |
|           |                                                                                         | High        | HDVPTVELLYKEK    |                                     | FALSE             | 1                | 1          | 13       | C6KT52                    | 1                      | 1570.847534    | 5.368060112      | High                  |
|           |                                                                                         | High        | INEVEKEIDVVK     | 1xDeamidated [N2]                   | FALSE             | 1                | 1          | 5        | C6KT52                    | 1                      | 1415.762802    | 5.308003902      | High                  |
|           |                                                                                         | High        | INEVEKEIDVVK     |                                     | FALSE             | 1                | 1          | 39       | C6KT52                    | 1                      | 1414.778786    | 5.090067387      | High                  |
|           |                                                                                         | High        | EKEDDGLNTGYINK   | 1xDeamidated [N8]                   | FALSE             | 1                | 1          | 4        | C6KT52                    | 1                      | 1596.738772    | 4.884541512      | High                  |
|           |                                                                                         | High        | NNNIFGYDINMNGNHR | 1xOxidation [M11]                   | FALSE             | 1                | 1          | 18       | C6KT52                    | 0                      | 1908.840568    | 4.592949867      | High                  |
|           |                                                                                         | High        | INEVEKEIDVVKYK   |                                     | FALSE             | 1                | 1          | 4        | C6KT52                    | 2                      | 1705.937077    | 4.553369522      | High                  |
|           |                                                                                         | High        | EDDGLNTGYINK     |                                     | FALSE             | 1                | 1          | 13       | C6KT52                    | 0                      | 1338.6172      | 4.366192818      | High                  |
|           |                                                                                         | High        | KEKEDDGLNTGYINK  |                                     | FALSE             | 1                | 1          | 1        | C6KT52                    | 2                      | 1723.849719    | 4.200821877      | High                  |
|           |                                                                                         | High        | FVEKEIIVDIKEK    |                                     | FALSE             | 1                | 1          | 1        | C6KT52                    | 2                      | 1589.914886    | 4.192780018      | High                  |
|           |                                                                                         | High        | YNEIFYNKDGK      | 1xDeamidated [N7]                   | FALSE             | 1                | 1          | 9        | C6KT52                    | 1                      | 1391.647772    | 4.160851479      | High                  |
|           |                                                                                         | High        | EKYQDVPVCK       | 1xCarbamido methyl [C9]             | FALSE             | 1                | 1          | 8        | C6KT52                    | 1                      | 1265.619449    | 4.066853523      | High                  |
|           |                                                                                         | High        | YNEIFYNKDGK      |                                     | FALSE             | 1                | 1          | 12       | C6KT52                    | 1                      | 1390.663756    | 3.881328821      | High                  |
|           |                                                                                         | High        | HDVPTVELLYK      |                                     | FALSE             | 1                | 1          | 21       | C6KT52                    | 0                      | 1313.709978    | 3.673598528      | High                  |
|           |                                                                                         | High        | IIQVEIPQIK       | 1xDeamidated [Q3]                   | FALSE             | 1                | 1          | 6        | C6KT52                    | 0                      | 1181.714002    | 3.425982952      | High                  |
|           |                                                                                         | High        | IIQVEIPQIK       |                                     | FALSE             | 1                | 1          | 2        | C6KT52                    | 0                      | 1180.729986    | 3.362946033      | High                  |
|           |                                                                                         | High        | KVNIPQEK         |                                     | FALSE             | 1                | 1          | 1        | C6KT52                    | 1                      | 955.5571067    | 3.289881229      | High                  |
|           |                                                                                         | High        | YNEIFYNK         |                                     | FALSE             | 1                | 1          | 5        | C6KT52                    | 0                      | 1090.520387    | 3.191084146      | High                  |

Access  
ionQ8I5P  
2

| Description                                                                                                        | Coverage   | # Peptides                   | # PSMs             | # Unique Peptides | # Protein Groups | # AAs      | MW [kDa] | calc. pI                  | Protein FDR Confidence | Exp. q-value   | Score            | # Peptides              |
|--------------------------------------------------------------------------------------------------------------------|------------|------------------------------|--------------------|-------------------|------------------|------------|----------|---------------------------|------------------------|----------------|------------------|-------------------------|
| Male development gene 1<br>OS=Plasmodium falciparum (isolate 3D7)<br>OX=36329<br>GN=PF3D7_1<br>216500 PE=4<br>SV=1 | 57.46606   | 17                           | 660                | 17                | 1                | 221        | 25.742   | 4.77                      | High                   | 0              | 2398.402315      | 17                      |
| Checked                                                                                                            | Confidence | Sequence                     | Modifications      | Contaminant       | # Protein Groups | # Proteins | # PSMs   | Master Protein Accessions | # Missed Cleavages     | Theo. MH+ [Da] | XCorr Sequest HT | Confidence Sequences HT |
| FALSE                                                                                                              | High       | KSFETFEQALHNK                |                    | FALSE             | 1                | 1          | 82       | Q8I5P2                    | 1                      | 1578.791082    | 5.913624763      | High                    |
| FALSE                                                                                                              | High       | TKNPDLDEQTKDIK               |                    | FALSE             | 1                | 1          | 52       | Q8I5P2                    | 2                      | 1644.843905    | 5.89708519       | High                    |
| FALSE                                                                                                              | High       | NVNSNEKANNLSTEW<br>NR        | 2xDeamidated [N]   | FALSE             | 1                | 1          | 15       | Q8I5P2                    | 1                      | 2078.937365    | 5.426760674      | High                    |
| FALSE                                                                                                              | High       | IQNKIGEYKDEK                 |                    | FALSE             | 1                | 1          | 5        | Q8I5P2                    | 2                      | 1577.853348    | 5.378252506      | High                    |
| FALSE                                                                                                              | High       | HYVKDVSEYIGAK                |                    | FALSE             | 1                | 1          | 13       | Q8I5P2                    | 1                      | 1508.774369    | 5.202528         | High                    |
| FALSE                                                                                                              | High       | NPDLDEQTKDIK                 |                    | FALSE             | 1                | 1          | 29       | Q8I5P2                    | 1                      | 1415.701264    | 5.180547237      | High                    |
| FALSE                                                                                                              | High       | NVNSNEKANNLSTEW<br>NR        | 1xDeamidated [N]   | FALSE             | 1                | 1          | 68       | Q8I5P2                    | 1                      | 2077.953349    | 5.14323616       | High                    |
| FALSE                                                                                                              | High       | STDNFVPFEENNK                | 1xDeamidated [N]   | FALSE             | 1                | 1          | 33       | Q8I5P2                    | 0                      | 1541.675444    | 4.86692524       | High                    |
| FALSE                                                                                                              | High       | AGDLLDENLESTLKPLLE<br>R      |                    | FALSE             | 1                | 1          | 5        | Q8I5P2                    | 0                      | 2126.133939    | 4.857997894      | High                    |
| FALSE                                                                                                              | High       | NGYLQSHGNLEEVK               |                    | FALSE             | 1                | 1          | 15       | Q8I5P2                    | 0                      | 1587.77616     | 4.789003372      | High                    |
| FALSE                                                                                                              | High       | NGYLQSHGNLEEVK               | 1xDeamidated [Q/N] | FALSE             | 1                | 1          | 28       | Q8I5P2                    | 0                      | 1588.760176    | 4.660150528      | High                    |
| FALSE                                                                                                              | High       | TKNPDLDEQTK                  |                    | FALSE             | 1                | 1          | 27       | Q8I5P2                    | 1                      | 1288.637936    | 4.598171234      | High                    |
| FALSE                                                                                                              | High       | NGYLQSHGNLEEVKDE<br>LANELANK |                    | FALSE             | 1                | 1          | 3        | Q8I5P2                    | 1                      | 2685.311462    | 4.503121376      | High                    |
| FALSE                                                                                                              | High       | STDNFVPFEENNK                |                    | FALSE             | 1                | 1          | 142      | Q8I5P2                    | 0                      | 1540.691428    | 4.484462738      | High                    |
| FALSE                                                                                                              | High       | NVNSNEKANNLSTEW<br>NR        |                    | FALSE             | 1                | 1          | 6        | Q8I5P2                    | 1                      | 2076.969333    | 4.480533123      | High                    |
| FALSE                                                                                                              | High       | SFETFEQALHNK                 |                    | FALSE             | 1                | 1          | 39       | Q8I5P2                    | 0                      | 1450.696119    | 4.318011761      | High                    |
| FALSE                                                                                                              | High       | ANNLSTEW<br>NR               |                    | FALSE             | 1                | 1          | 30       | Q8I5P2                    | 0                      | 1291.602553    | 4.06025219       | High                    |
| FALSE                                                                                                              | High       | DELANELANK                   |                    | FALSE             | 1                | 1          | 13       | Q8I5P2                    | 0                      | 1116.553143    | 4.054634094      | High                    |
| FALSE                                                                                                              | High       | ANNLSTEW<br>NR               | 1xDeamidated [N]   | FALSE             | 1                | 1          | 41       | Q8I5P2                    | 0                      | 1292.586569    | 3.953553677      | High                    |
| FALSE                                                                                                              | High       | IGEYKDEK                     |                    | FALSE             | 1                | 1          | 4        | Q8I5P2                    | 1                      | 1094.572816    | 3.612656116      | High                    |
| FALSE                                                                                                              | High       | NPDLDEQTK                    |                    | FALSE             | 1                | 1          | 2        | Q8I5P2                    | 0                      | 1059.495294    | 3.58833766       | High                    |
| FALSE                                                                                                              | High       | DVSEYIGAK                    |                    | FALSE             | 1                | 1          | 8        | Q8I5P2                    | 0                      | 981.4887523    | 3.239928722      | High                    |

**Table S3. Schedule and results of the standard membrane feeding assay performed at Johns Hopkins Malaria Research Institute.** Serum samples collected from mice immunized with each listed antigen was purified and tested at 500µg/mL; negative controls contained purified IgG from naïve mice (tested at 750µg/mL), whereas positive controls used monoclonal antibody 4B7 against Pfs25 known to possess reliable transmission reducing activity (tested at 100µg/mL).

<sup>a</sup>The bolded antigens were those that induced IgG with notable transmission reducing activity (%TRA).

<sup>b</sup>Transmission-reducing activity was quantified by comparing each experimental IgG sample to the negative control from the same SMFA.

| Date of SMFA | Antigen <sup>a</sup> | Adjuvant | Mean Oocyst       | %TRA <sup>b</sup> |
|--------------|----------------------|----------|-------------------|-------------------|
| 12/17/201    |                      |          |                   |                   |
| 8            |                      |          |                   |                   |
|              | Neg Control          |          | 25.35 (0-59, n26) |                   |
|              | Pos Control          |          | 1.57 (0-7, n39)   | 93.78             |
|              | PF3D7_1454900        | CFA      | 34.14 (0-79, n36) | -34.67            |
|              | PF3D7_1471700        | CFA      | 28.20 (0-58, n30) | -11.24            |
|              | PF3D7_0621400        | CFA      | 25.78 (0-47, n37) | -1.69             |
|              | (18-290)             |          |                   |                   |

|                            |     |                      |       |
|----------------------------|-----|----------------------|-------|
| PF3D7_1431100              | CFA | 23.82 (0-51,<br>n22) | 6.03  |
| PF3D7_1216500              | CFA | 21.67 (0-53,<br>n46) | 14.51 |
| PF3D7_1453500<br>(357-655) | CFA | 6.42 (0-31, n19)     | 74.67 |

1/7/2019

|                                    |                           |                         |              |
|------------------------------------|---------------------------|-------------------------|--------------|
| Neg Control                        |                           | 17.44 (0-40,<br>n25)    |              |
| Pos Control                        |                           | 0.91 (0-5, n24)         | 94.74        |
| PF3D7_1454900                      | Montanide/CpG             | 17.82 (0-49,<br>n36)    | -2.17        |
| PF3D7_1216500                      | Montanide/CpG             | 17.14 (0-52,<br>n37)    | 1.72         |
| PF3D7_1453500<br>(367-655)         | CFA                       | 16.52 (0-36,<br>n25)    | 5.27         |
| PF3D7_1431100                      | Montanide/CpG             | 15.00 (0-36,<br>n36)    | 13.99        |
| PF3D7_0621400<br>(18-290)          | Montanide/CpG             | 14.45 (0-41,<br>n22)    | 17.14        |
| PF3D7_1471700                      | Montanide/CpG             | 9.84 (0-33, n32)        | 43.55        |
| <b>PF3D7_1453500<br/>(367-655)</b> | <b>Montanide/Cp<br/>G</b> | <b>8.42 (0-18, n21)</b> | <b>51.66</b> |

2/15/2019

|                      |            |                         |              |
|----------------------|------------|-------------------------|--------------|
| Neg Control          |            | 5.25 (0-20, n28)        |              |
| Pos Control          |            | 0.32 (0-1, n31)         | 93.85        |
| PF3D7_0530800        | CFA        | 3.48 (0-20, n39)        | 33.58        |
| PF3D7_1216500        | CFA        | 2.87 (0-13, n40)        | 45.23        |
| <b>PF3D7_1210200</b> | <b>CFA</b> | <b>1.76 (0-11),</b>     | <b>66.47</b> |
| <b>(634–849)</b>     |            | <b>n25)</b>             |              |
| <b>PF3D7_1213400</b> | <b>CFA</b> | <b>1.58 (0-16, n29)</b> | <b>69.79</b> |

2/22/2019

|                      |            |                                    |              |
|----------------------|------------|------------------------------------|--------------|
| Neg Control          |            | 24.05 (0-56,<br>n39)               |              |
| Pos Control          |            | 0.53 (0-2, n30)                    | 97.78        |
| PF3D7_1204200        | CFA        | 17.84 (0-33,<br>n38)               | 25.82        |
| PF3D7_1453500        | CFA        | 16.18 (0-34,<br>(677–1045)<br>n51) | 32.72        |
| PF3D7_0621400        | CFA        | 14.87 (0-27,<br>(315–664)<br>n31)  | 38.17        |
| PF3D7_0930000        | CFA        | 14.48 (0-41,<br>n25)               | 39.79        |
| <b>PF3D7_1146100</b> | <b>CFA</b> | <b>12.98 (0-26,<br/>n42)</b>       | <b>46.02</b> |

2/28/2019

|                      |                     |                         |              |
|----------------------|---------------------|-------------------------|--------------|
| Neg Control          |                     | 5.96 (0-39, n27)        |              |
| Pos Control          |                     | 1.13 (0-6, n38)         | 81.01        |
| PF3D7_1204200        | Montanide/CpG       | 9.30 (0-41, n39)        | -56.09       |
| PF3D7_1453500        | Montanide/CpG       | 8.67 (0-33, n40)        | -45.48       |
| (677–1045)           |                     |                         |              |
| PF3D7_1146100        | Montanide/CpG       | 8.48 (0-41, n25)        | -42.21       |
| <b>PF3D7_0930000</b> | <b>Montanide/Cp</b> | <b>4.42 (0-29, n40)</b> | <b>25.79</b> |
|                      | <b>G</b>            |                         |              |
| <b>PF3D7_0621400</b> | <b>Montanide/Cp</b> | <b>2.84 (0-21, n32)</b> | <b>52.3</b>  |
| <b>(315–644)</b>     | <b>G</b>            |                         |              |

3/7/2019

|                      |                     |                         |              |
|----------------------|---------------------|-------------------------|--------------|
| Neg Control          |                     | 10.70 (0-25,<br>n47)    |              |
| Pos Control          |                     | 5.97 (0-14, n38)        | 44.17        |
| PF3D7_1362600        | Montanide/CpG       | 6.52 (0-28, n36)        | 38.99        |
| <b>PF3D7_1210200</b> | <b>Montanide/Cp</b> | <b>4.55 (0-21, n49)</b> | <b>57.46</b> |
| <b>(634–849)</b>     | <b>G</b>            |                         |              |
| <b>PF3D7_1213400</b> | <b>Montanide/Cp</b> | <b>2.95 (0-13, n45)</b> | <b>72.37</b> |
|                      | <b>G</b>            |                         |              |
| <b>PF3D7_1216500</b> | <b>Montanide/Cp</b> | <b>2.77 (0-9, n40)</b>  | <b>74.06</b> |
|                      | <b>G</b>            |                         |              |
| <b>PF3D7_0530800</b> | <b>Montanide/Cp</b> | <b>2.21 (0-13, n49)</b> | <b>79.32</b> |
|                      | <b>G</b>            |                         |              |

3/22/2019

|               |     |                      |        |
|---------------|-----|----------------------|--------|
| Neg Control   |     | 38.66 (0-93,<br>n27) |        |
| Pos Control   |     | 2.19 (0-13, n26)     | 94.32  |
|               | CFA | 43.20 (0-83,<br>n31) | -11.76 |
| PF3D7_0827200 |     |                      |        |
| PF3D7_0418800 | CFA | 34.06 (0-65,<br>n29) | 11.87  |
| (21-230)      |     |                      |        |
| PF3D7_0621400 | CFA | 30.12 (0-71,<br>n24) | 22.07  |
| (315-644)     |     |                      |        |

---

**Table S4. Results of standard membrane feeding assay performed at National Institutes of Health using sera with putative transmission-reducing activity.** Experimental sera were

spiked into blood culture at a final concentration of 750 µg/mL. Otherwise, SMFA was performed as described in Supplemental Table 2. All experimental sera were derived from BALB/c mice immunized with the listed antigen and Montanide/CpG as an adjuvant unless otherwise noted. All antigens were produced recombinantly in *E. coli*.

<sup>a</sup>Assay #1 included all 10 putative transmission-blocking sera as identified by SMFA at JHMRI.

<sup>b</sup> Complete Freund's Adjuvant (CFA) was used as an adjuvant to elicit indicated serum samples. PF3D7\_0621400 (315-664) [Pf77], PF3D7\_1210200 (634-849) [zinc finger protein, putative], and PF3D7\_1216500 [PfMDV-1] yielded significant %TRA (>80%) and were re-evaluated immediately in Assay #2. PF3D7\_0621400 (315-664) [Pf77] and PF3D7\_1216500 [PfMDV-1] once again displayed transmission-blocking potential. The remaining antigens were screened once more in Assay #3. PF3D7\_0930000 exhibited >80% TRA in Assay #3. PF3D7\_0621400 (315-664) [Pf77] and PF3D7\_1216500 [PfMDV-1] were selected for further evaluation due to their consistent reduction of oocyst formation in SMFA, but PF3D7\_1210200 (634-849) [zinc finger protein, putative] and PF3D7\_0930000 [procollagen lysine 5-dioxygenase, putative] should be noted for future experiments.

<sup>c</sup>Number of infected mosquitoes out of 20 mosquitoes dissected.

| Name                        | Mean<br>oocyst | %TRA | (95%CI)    | p-value | Infect mosq <sup>c</sup> |
|-----------------------------|----------------|------|------------|---------|--------------------------|
| <b>Assay #1<sup>a</sup></b> |                |      |            |         |                          |
| Control                     | 2.9            |      |            |         |                          |
| PF3D7_0621400 (315-664)     | 0.1            | 96.6 | (90 to 99) | 0.001   | 2                        |

|                                      |     |      |              |       |    |
|--------------------------------------|-----|------|--------------|-------|----|
| PF3D7_1453500 (367-655)              | 2.7 | 8.6  | (-117 to 65) | 0.829 | 11 |
| PF3D7_1210200 (634-849) <sup>b</sup> | 1.4 | 53.4 | (-40 to 89)  | 0.145 | 11 |
| PF3D7_1210200 (634-849)              | 0.6 | 81.0 | (42 to 96)   | 0.004 | 6  |
| PF3D7_0530800                        | 0.9 | 70.7 | (-33 to 95)  | 0.081 | 4  |
| PF3D7_1213400 <sup>b</sup>           | 1.0 | 65.5 | (-13 to 93)  | 0.071 | 7  |
| PF3D7_1213400                        | 2.4 | 17.2 | (-167 to 76) | 0.679 | 8  |
| PF3D7_1146100 <sup>b</sup>           | 1.8 | 39.7 | (-39 to 73)  | 0.237 | 6  |
| PF3D7_1216500                        | 0.3 | 89.7 | (69 to 98)   | 0.001 | 3  |
| PF3D7_0930000                        | 1.1 | 62.1 | (4 to 87)    | 0.036 | 10 |

### **Assay #2**

|                         |      |      |             |       |    |
|-------------------------|------|------|-------------|-------|----|
| Control                 | 11.8 |      |             |       |    |
| PF3D7_0621400 (315-664) | 1.6  | 86.9 | (71 to 95)  | 0.001 | 7  |
| PF3D7_1210200 (634-849) | 7.7  | 35.2 | (-44 to 72) | 0.284 | 13 |
| PF3D7_1216500           | 2.8  | 76.3 | (17 to 96)  | 0.014 | 8  |

### **Assay #3**

|                                      |      |       |              |       |    |
|--------------------------------------|------|-------|--------------|-------|----|
| Control                              | 6.3  |       |              |       |    |
| PF3D7_1453500 (367-655)              | 5.2  | 17.6  | (-83 to 64)  | 0.640 | 12 |
| PF3D7_1210200 (634-849) <sup>b</sup> | 3.6  | 42.4  | (-33 to 75)  | 0.194 | 13 |
| PF3D7_0530800                        | 2.3  | 64.0  | (4 to 88)    | 0.034 | 10 |
| PF3D7_1213400 <sup>b</sup>           | 3.5  | 44.0  | (-29 to 76)  | 0.166 | 11 |
| PF3D7_1213400                        | 11.8 | -88.0 | (-342 to 19) | 0.132 | 15 |
| PF3D7_1146100 <sup>b</sup>           | 5.4  | 14.4  | (-92 to 65)  | 0.682 | 15 |
| PF3D7_0930000                        | 1.2  | 80.8  | (55 to 92)   | 0.001 | 7  |

---

**Table S5. Results of quantitative real-time polymerase chain reaction to determine RNA copy number of selected putative transmission-blocking antigens in life cycle stages of *Plasmodium falciparum*.** A quantitative real-time polymerase chain reaction (qPCR) was performed to quantify transcript abundance of the putative transmission-blocking antigens in the life stages of *P. falciparum*. SPZ: Sporozoite; BS: asynchronous blood stage; GA: gametocyte; MG: oocysts recovered from midguts of *Anopheles stephensi* 2 (D2) or 6 (D6) days following infectious bloodmeal.

| Gene                                     | RNA Copy Number in <i>Plasmodium falciparum</i> life stages |        |         |       |        |
|------------------------------------------|-------------------------------------------------------------|--------|---------|-------|--------|
|                                          | SPZ                                                         | BS     | GA      | MG    |        |
|                                          |                                                             |        |         | D2    | D6     |
| <b>PF3D7_0621400</b><br>(315-644) [Pf77] | 8680                                                        | 123485 | 2632017 | 2791  | 107926 |
| <b>PF3D7_1453500</b><br>(367-655)        | 10474                                                       | 9845   | 3598732 | 540   | 18541  |
| <b>PF3D7_1146100</b>                     | 5849                                                        | 90794  | 26395   | 923   | 15208  |
| <b>PF3D7_0930000</b>                     | 9228                                                        | 9436   | 3306023 | 4420  | 12964  |
| <b>PF3D7_1210200</b><br>(634-849)        | 14560                                                       | 19666  | 3297270 | 19429 | 33506  |
| <b>PF3D7_0530800</b>                     | 2123                                                        | 258729 | 8808    | 558   | 8278   |
| <b>PF3D7_1213400</b>                     | 33593                                                       | 7239   | 3288540 | 15000 | 53644  |

**PF3D7\_1216500**

[PfMDV-1]

11315

104215

2140338

544

70835

---

**Table S6. Calculation of minor allele frequencies for *Plasmodium falciparum* proteins Pf77 and PfMDV-1.** Amino acid positions with significant minor allele frequencies are listed for both Pf77 and PfMDV-1. Amino acids with the highest minor allele frequencies are indicated in yellow.

| Gene                 | Amino Acid Position | Allele Frequency |
|----------------------|---------------------|------------------|
| PF3D7_0621400 [Pf77] | 15                  | 0.005            |
|                      | 164                 | 0.064            |
|                      | 192                 | 0.005            |
|                      | 210                 | 0.005            |
|                      | 239                 | 0.005            |
|                      | 246                 | 0.057            |
|                      | 253                 | 0.005            |
|                      | 283                 | 0.005            |
|                      | 284                 | 0.005            |
|                      | 286                 | 0.028            |
|                      | 287                 | 0.046            |
|                      | 289                 | 0.020            |
|                      | 290                 | 0.011            |
|                      | 291                 | 0.005            |
|                      | 299                 | 0.021            |
|                      | 300                 | 0.011            |
|                      | 302                 | 0.073            |
|                      | 303                 | 0.026            |

|                                |     |       |
|--------------------------------|-----|-------|
|                                | 305 | 0.005 |
|                                | 310 | 0.024 |
|                                | 337 | 0.009 |
|                                | 350 | 0.014 |
|                                | 351 | 0.040 |
|                                | 361 | 0.005 |
|                                | 374 | 0.005 |
|                                | 383 | 0.005 |
|                                | 397 | 0.005 |
|                                | 450 | 0.005 |
|                                | 466 | 0.330 |
|                                | 516 | 0.005 |
|                                | 518 | 0.005 |
|                                | 521 | 0.005 |
|                                | 566 | 0.005 |
|                                | 578 | 0.005 |
|                                | 587 | 0.005 |
|                                | 592 | 0.005 |
|                                | 634 | 0.005 |
| <hr/>                          |     |       |
| <b>PF3D7_1216500 [PfMDV-1]</b> | 5   | 0.005 |
|                                | 27  | 0.005 |
|                                | 34  | 0.005 |
|                                | 35  | 0.005 |

|    |       |
|----|-------|
| 98 | 0.005 |
|----|-------|

|     |       |
|-----|-------|
| 102 | 0.005 |
|-----|-------|

|     |       |
|-----|-------|
| 109 | 0.018 |
|-----|-------|

|     |       |
|-----|-------|
| 141 | 0.056 |
|-----|-------|

|     |       |
|-----|-------|
| 177 | 0.005 |
|-----|-------|

|     |       |
|-----|-------|
| 178 | 0.005 |
|-----|-------|

|     |       |
|-----|-------|
| 181 | 0.005 |
|-----|-------|

|     |       |
|-----|-------|
| 182 | 0.005 |
|-----|-------|

|     |       |
|-----|-------|
| 184 | 0.005 |
|-----|-------|

|     |       |
|-----|-------|
| 190 | 0.009 |
|-----|-------|

|     |       |
|-----|-------|
| 192 | 0.005 |
|-----|-------|

---
